# Supplementary material for: The yeast endocytic early/sorting compartment exists as an independent sub-compartment within the trans-Golgi network
Source: eLife. 2023 Jul 21;12:e84850. doi: 10.7554/eLife.84850 (PMC10361720; doi:10.7554/eLife.84850)
Supplement: Figure 1—source data 1. [file elife-84850-fig1-data1.xlsx]

## Sheet: Fig1B (Statistics)
	Numerical data					Statistical analysis using Graphpad Prism 6.0
		% Tlg2p Overlap with a-factor				ANOVA summary 5 min							Tukey's multiple comparisons test result 5min
		5 min	10 min	20 min		P value summary	***							Mean Diff.	95.00% CI of diff.	Significant?	Summary	Adjusted P Value
	1st assay	77.7778	76	45.4545		Are differences among means statistically significant? (P < 0.05)	Yes						Sec7p vs. Tlg2p	-45.01	-63.5 to -26.52	Yes	***	0.0007
	2nd assay	70	80	45.4545		R square	0.9305						Tlg1p vs. Tlg2p	3.34	-15.15 to 21.83	No	ns	0.8483
	3rd assay	65.3846	75	52.1739									Tlg1p vs. Sec7p	48.35	29.86 to 66.84	Yes	***	0.0005
						Brown-Forsythe test
						F (DFn, DFd)	0.143 (2, 6)
						P value	0.8696
						P value summary	ns
	Numerical data					Significantly different standard deviations? (P < 0.05)	No
		% Sec7p Overlap with a-factor
		5 min	10 min	20 min
	1st assay	33.3333	16.6667	0		ANOVA table	SS	DF	MS	F (DFn, DFd)	P value
	2nd assay	29.4118	28.5714	10.7143		Treatment (between columns)	4375	2	2187	F (2, 6) = 40.14	P=0.0003
	3rd assay	15.3846	22.7273	4.16667		Residual (within columns)	326.9	6	54.49
						Total	4702	8
	Numerical data					Data summary
		% Tlg1p Overlap with a-factor				Number of treatments (columns)	3
		5 min	10 min	20 min		Number of values (total)	9
	1st assay	80	55.2632	20.8333
	2nd assay	68.1818	48	24
	3rd assay	75	50	33.3333		ANOVA summary 10 min							Tukey's multiple comparisons test result 10min
						P value summary	****							Mean Diff.	95.00% CI of diff.	Significant?	Summary	Adjusted P Value
						Are differences among means statistically significant? (P < 0.05)	Yes						Sec7p vs. Tlg2p	-54.34	-65.22 to -43.47	Yes	****	<0.0001
						R square	0.9751						Tlg1p vs. Tlg2p	-25.91	-36.79 to -15.04	Yes	***	0.0008
													Tlg1p vs. Sec7p	28.43	17.56 to 39.31	Yes	***	0.0005
						Brown-Forsythe test
						F (DFn, DFd)	0.5338 (2, 6)
						P value	0.6119
						P value summary	ns
						Significantly different standard deviations? (P < 0.05)	No
						ANOVA table	SS	DF	MS	F (DFn, DFd)	P value
						Treatment (between columns)	4433	2	2217	F (2, 6) = 117.7	P<0.0001
						Residual (within columns)	113	6	18.84
						Total	4546	8
						Data summary
						Number of treatments (columns)	3
						Number of values (total)	9
						ANOVA summary 20 min							Tukey's multiple comparisons test result 20min
						P value summary	***							Mean Diff.	95.00% CI of diff.	Significant?	Summary	Adjusted P Value
						Are differences among means statistically significant? (P < 0.05)	Yes						Sec7p vs. Tlg2p	-42.73	-56.18 to -29.29	Yes	***	0.0002
						R square	0.9406						Tlg1p vs. Tlg2p	-21.64	-35.09 to -8.19	Yes	**	0.0063
													Tlg1p vs. Sec7p	21.1	7.647 to 34.54	Yes	**	0.0071
						Brown-Forsythe test
						F (DFn, DFd)	0.1804 (2, 6)
						P value	0.8393
						P value summary	ns
						Significantly different standard deviations? (P < 0.05)	No
						ANOVA table	SS	DF	MS	F (DFn, DFd)	P value
						Treatment (between columns)	2739	2	1370	F (2, 6) = 47.53	P=0.0002
						Residual (within columns)	172.9	6	28.82
						Total	2912	8
						Data summary
						Number of treatments (columns)	3
						Number of values (total)	9
