# Supplementary material for: The yeast endocytic early/sorting compartment exists as an independent sub-compartment within the trans-Golgi network
Source: eLife. 2023 Jul 21;12:e84850. doi: 10.7554/eLife.84850 (PMC10361720; doi:10.7554/eLife.84850)
Supplement: Figure 2—source data 1. [file elife-84850-fig2-data1.xlsx]

## Sheet: Fig2H (Statistics)
	Numerical data				Statistical analysis using Graphpad Prism 6.0
	% Abp1-mCH merge with GFP-Tlg2p,or GFP-Vps21p				Unpaired t-test with Welch's correction result
	Assay	Tlg2p	Vps21p		Column B	Vps21p
	1	23.0769	4.7619		vs.	vs.
	2	17.8571	3.77358		Column A	Tlg2p
	3	22.2222	2.89855
	4	22.2222	2.85714		P value	<0.0001
	5	11.1111	0		P value summary	****
	6	14	9.09091		Significantly different? (P < 0.05)	Yes
	7	21.5686	4.08163		One- or two-tailed P value?	Two-tailed
	8	26.5306	2.27273		Welch-corrected t, df	t=8.632 df=18
	9	16.6667	6.66667
	10	14.2857	2.32558		Mean ± SEM of column A	18.95 ± 1.552, n=10
					Mean ± SEM of column B	3.873 ± 0.8015, n=10
					Difference between means	-15.08 ± 1.747
					95% confidence interval	-18.75 to -11.41
					R squared	0.8054
