# Supplementary material for: The yeast endocytic early/sorting compartment exists as an independent sub-compartment within the trans-Golgi network
Source: eLife. 2023 Jul 21;12:e84850. doi: 10.7554/eLife.84850 (PMC10361720; doi:10.7554/eLife.84850)
Supplement: Figure 3—source data 1. [file elife-84850-fig3-data1.xlsx]

## Sheet: Fig3B (Statistics)
	Numerical data				Statistical analysis using Graphpad Prism 6.0
	% Tlg2p or Sec7p overlap with Vps21p				Unpaired t-test with Welch's correction result
		Tlg2p	Sec7p		Column B	Sec7p
	1st assay	38.7097	16		vs.	vs.
	2nd assay	58.1395	36		Column A	Tlg2p
	3rd assay	61.9048	25.9259
					P value	0.0431
					P value summary	*
					Significantly different? (P < 0.05)	Yes
					One- or two-tailed P value?	Two-tailed
					Welch-corrected t, df	t=2.923 df=4
					Mean ± SEM of column A	52.92 ± 7.187, n=3
					Mean ± SEM of column B	25.98 ± 5.774, n=3
					Difference between means	-26.94 ± 9.219
					95% confidence interval	-52.54 to -1.347
					R squared	0.6811
