# Supplementary material for: The yeast endocytic early/sorting compartment exists as an independent sub-compartment within the trans-Golgi network
Source: eLife. 2023 Jul 21;12:e84850. doi: 10.7554/eLife.84850 (PMC10361720; doi:10.7554/eLife.84850)
Supplement: Figure 3—source data 2. [file elife-84850-fig3-data2.xlsx]

## Sheet: Data list
	Figure No.	Data shown in the graph	Statistical method
	Figure 1B	% of Tlg2p or Sec7p or Tlg1p overlap with A594-a-factor	One-way ANOVA with Tukey's post-hoc test
	Figure 2H	% of Tlg2p or Vps21p merge with Abp1p	Unpaired t-test with Welch's correction
	Figure 3B	% of Tlg2p or Sec7p overlap with Vps21p	Unpaired t-test with Welch's correction
	Figure 3I	% of A647-a-factor co-localization with Tlg2p or Vps21p	One-way ANOVA with Tukey's post-hoc test
	Figure 3K	% of Tlg2p overlap with A594-a-factor in vps21D ypt52D cells	Unpaired t-test with Welch's correction
	Figure 4C	% of Sec7p localization with A594-a-factor	Unpaired t-test with Welch's correction
	Figure 4E	% of Tlg2p overlap with A594-a-factor
	Figure 5B	% of Tlg2p overlap with Sec7p	Unpaired t-test with Welch's correction
	Figure 2-figure supplement 1B	Number of Sec7p-positive puncta	Unpaired t-test with Welch's correction
	Figure 2-figure supplement 1D	% of Tlg2p overlap with Sec7p	Unpaired t-test with Welch's correction
	Figure 2-figure supplement 1E	Sec7p lifetime	Unpaired t-test with Welch's correction
	Figure 5-figure supplement 1H	% of Gga2p overlap with Tlg2p
	Figure 6-figure supplement 1B	% of Snc1p overlap with Tlg21p
	Figure 7-figure supplement 1F	% of Ypt31p overlap with A594-a-factor

## Sheet: Fig3I  (Statistic)
	Numerical data						Statistical analysis using Graphpad Prism 6.0
	5 min						ANOVA summary a-factor alone							Tukey's multiple comparisons test result
		a-factor alone	a-factor & Tlg2p	a-factor & Vps21p	a-factor & Vps21p		F	41.98							Mean Diff.	95% CI of diff.	Significant?	Summary	Adjusted P Value
					& Tlg2p		P value	0.0003						a-factor alone 5min vs 10min	-18.58	-27.84 to -9.332	Yes	**	0.002
	1st assay	30.7692	30.7692	23.0769	15.3846		P value summary	***						a-factor alone 5min vs 20min	-27	-36.25 to -17.74	Yes	***	0.0003
	2nd assay	26.3158	31.5789	31.5789	10.5263		Are differences among means statistically significant? (P < 0.05)	Yes						a-factor alone 10min vs 20min	-8.412	-17.66 to 0.8393	No	ns	0.0707
	3rd assay	33.3333	33.3333	20.8333	12.5		R square	0.9333
							Brown-Forsythe test
	10 min						F (DFn, DFd)	0.1356 (2, 6)
		a-factor alone	a-factor & Tlg2p	a-factor & Vps21p	a-factor & Vps21p		P value	0.8758
					& Tlg2p		P value summary	ns
	1st assay	8	24	40	28		Significantly different standard deviations? (P < 0.05)	No
	2nd assay	16.6667	12.5	58.3333	12.5
	3rd assay	10	25	55	10		ANOVA table	SS	DF	MS	F (DFn, DFd)	P value
							Treatment (between columns)	1145	2	572.5	F (2, 6) = 41.98	P=0.0003
							Residual (within columns)	81.82	6	13.64
	20 min						Total	1227	8
		a-factor alone	a-factor & Tlg2p	a-factor & Vps21p	a-factor & Vps21p
					& Tlg2p		Data summary
	1st assay	0	0	80	20		Number of treatments (columns)	6
	2nd assay	5.26316	0	68.4211	26.3158		Number of values (total)	900
	3rd assay	4.16667	0	79.1667	16.6667
							ANOVA summary a-factor & Tlg2p							Tukey's multiple comparisons test result
							F	47.05						a-factor & Tlg2p 5min vs 10min	-11.39	-21.62 to -1.17	Yes	*	0.0327
							P value	0.0002						a-factor & Tlg2p 5min vs 20min	-31.89	-42.12 to -21.67	Yes	***	0.0002
							P value summary	***						a-factor & Tlg2p 10min vs 20min	-20.5	-30.72 to -10.28	Yes	**	0.0021
							Are differences among means statistically significant? (P < 0.05)	Yes
							R square	0.9401
							Brown-Forsythe test
							F (DFn, DFd)	1.054 (2, 6)
							P value	0.4052
							P value summary	ns
							Significantly different standard deviations? (P < 0.05)	No
							ANOVA table	SS	DF	MS	F (DFn, DFd)	P value
							Treatment (between columns)	1567	2	783.6	F (2, 6) = 47.05	P=0.0002
							Residual (within columns)	99.94	6	16.66
							Total	1667	8
							Data summary
							Number of treatments (columns)	3
							Number of values (total)	9
							ANOVA summary a-factor & Vps21p							Tukey's multiple comparisons test result
							F	34.19						a-factor & Vps21p 5min vs 10min	25.95	7.133 to 44.76	Yes	*	0.013
							P value	0.0005						a-factor & Vps21p 5min vs 20min	50.7	31.88 to 69.51	Yes	***	0.0004
							P value summary	***						a-factor & Vps21p 10min vs 20min	24.75	5.937 to 43.57	Yes	*	0.0161
							Are differences among means statistically significant? (P < 0.05)	Yes
							R square	0.9193
							Brown-Forsythe test
							F (DFn, DFd)	0.1478 (2, 6)
							P value	0.8657
							P value summary	ns
							Significantly different standard deviations? (P < 0.05)	No
							ANOVA table	SS	DF	MS	F (DFn, DFd)	P value
							Treatment (between columns)	3856	2	1928	F (2, 6) = 34.19	P=0.0005
							Residual (within columns)	338.4	6	56.4
							Total	4195	8
							Data summary
							Number of treatments (columns)	3
							Number of values (total)	9
							ANOVA summary a-factor & Vps21p & Tlg2p							Tukey's multiple comparisons test result
							F	1.207						a-factor & Tlg2p & Vps21p 5min vs 10min	4.03	-12.15 to 20.21	No	ns	0.7367
							P value	0.3626						a-factor & Tlg2p & Vps21p 5min vs 20min	8.191	-7.985 to 24.37	No	ns	0.3338
							P value summary	ns						a-factor & Tlg2p & Vps21p 10min vs 20min	4.161	-12.01 to 20.34	No	ns	0.7228
							Are differences among means statistically significant? (P < 0.05)	No
							R square	0.2869
							Brown-Forsythe test
							F (DFn, DFd)	0.5433 (2, 6)
							P value	0.6069
							P value summary	ns
							Significantly different standard deviations? (P < 0.05)	No
							ANOVA table	SS	DF	MS	F (DFn, DFd)	P value
							Treatment (between columns)	100.6	2	50.32	F (2, 6) = 1.207	P=0.3626
							Residual (within columns)	250.1	6	41.69
							Total	350.8	8
							Data summary
							Number of treatments (columns)	3
							Number of values (total)	9
