# Supplementary material for: The yeast endocytic early/sorting compartment exists as an independent sub-compartment within the trans-Golgi network
Source: eLife. 2023 Jul 21;12:e84850. doi: 10.7554/eLife.84850 (PMC10361720; doi:10.7554/eLife.84850)
Supplement: Figure 3—source data 3. [file elife-84850-fig3-data3.xlsx]

## Sheet: Data list
	Figure No.	Data shown in the graph	Statistical method
	Figure 1B	% of Tlg2p or Sec7p or Tlg1p overlap with A594-a-factor	One-way ANOVA with Tukey's post-hoc test
	Figure 2H	% of Tlg2p or Vps21p merge with Abp1p	Unpaired t-test with Welch's correction
	Figure 3B	% of Tlg2p or Sec7p overlap with Vps21p	Unpaired t-test with Welch's correction
	Figure 3I	% of A647-a-factor co-localization with Tlg2p or Vps21p	One-way ANOVA with Tukey's post-hoc test
	Figure 3K	% of Tlg2p overlap with A594-a-factor in vps21D ypt52D cells	Unpaired t-test with Welch's correction
	Figure 4C	% of Sec7p localization with A594-a-factor	Unpaired t-test with Welch's correction
	Figure 4E	% of Tlg2p overlap with A594-a-factor
	Figure 5B	% of Tlg2p overlap with Sec7p	Unpaired t-test with Welch's correction
	Figure 2-figure supplement 1B	Number of Sec7p-positive puncta	Unpaired t-test with Welch's correction
	Figure 2-figure supplement 1D	% of Tlg2p overlap with Sec7p	Unpaired t-test with Welch's correction
	Figure 2-figure supplement 1E	Sec7p lifetime	Unpaired t-test with Welch's correction
	Figure 5-figure supplement 1H	% of Gga2p overlap with Tlg2p
	Figure 6-figure supplement 1B	% of Snc1p overlap with Tlg21p
	Figure 7-figure supplement 1F	% of Ypt31p overlap with A594-a-factor

## Sheet: Fig3K(Statistic)
	Numerical data				Statistical analysis using Graphpad Prism 6.0
	% Tlg2p overlap with a-factor				Unpaired t-test with Welch's correction result
		5 min	20 min		Column B	20 min
	1st assay	50	69.22		vs.	vs.
	2nd assay	55	80		Column A	5 min
	3rd assay	53.125	90
					P value	0.0109
					P value summary	*
					Significantly different? (P < 0.05)	Yes
					One- or two-tailed P value?	One-tailed
					Welch-corrected t, df	t=5.049 df=2.932
					How big is the difference?
					Mean ± SEM of column A	52.71 ± 2.53, n=3
					Mean ± SEM of column B	79.74 ± 10.38, n=3
					Difference between means	27.03 ± 6.482
					95% confidence interval	11.83 to 53.64
					R squared	0.6969
