# Supplementary material for: The yeast endocytic early/sorting compartment exists as an independent sub-compartment within the trans-Golgi network
Source: eLife. 2023 Jul 21;12:e84850. doi: 10.7554/eLife.84850 (PMC10361720; doi:10.7554/eLife.84850)
Supplement: Figure 4—source data 1. [file elife-84850-fig4-data1.xlsx]

## Sheet: Fig4C (Statistics) 
	Numerical data					Statistical analysis using Graphpad Prism 6.0
	% Sec7p overlap with a-factor					Unpaired t-test with Welch's correction result
		WT	gga1Dgga2D	ent3Dent5D		Column B	gga1Dgga2D	ent3Dent5D
	1st assay	0	61.5385	7.4		vs.	vs.	vs.
	2nd assay	10.7143	50	16		Column A	WT	WT
	3rd assay	4.16667	55.5556	12
						P value	0.0004	0.1614
						P value summary	***	ns
						Significantly different? (P < 0.05)	Yes	No
						One- or two-tailed P value?	Two-tailed	Two-tailed
						Welch-corrected t, df	t=11.12 df=4	t=1.715 df=4
						Mean ± SEM of column A	4.96 ± 3.118, n=3	4.96 ± 3.118, n=3
						Mean ± SEM of column B	55.7 ± 3.332, n=3	11.8 ± 2.485, n=3
						Difference between means	50.74 ± 4.563	6.84 ± 3.987
						95% confidence interval	38.07 to 63.41	-4.23 to 17.91
						R squared	0.9687	0.4239
