# Supplementary material for: The yeast endocytic early/sorting compartment exists as an independent sub-compartment within the trans-Golgi network
Source: eLife. 2023 Jul 21;12:e84850. doi: 10.7554/eLife.84850 (PMC10361720; doi:10.7554/eLife.84850)
Supplement: Figure 4—source data 2. [file elife-84850-fig4-data2.xlsx]

## Sheet: Fig4E(Data) 
	Numerical data
	% Tlg2p Overlap with a-factor
		5 min		10 min		20 min		40min
		65nm<	65nm-130nm	65nm<	65nm-130nm	65nm<	65nm-130nm	65nm<	65nm-130nm
	1st assay	14.2857	28.5714	35	35	35	55	33.3333	53.3333
	2nd assay	11.7647	47.0588	17.6471	29.4118	20	73.3333	46.6667	40
	3rd assay	31.25	25	30.4348	39.1304	42.8571	42.8571	26.6667	60
