# Supplementary material for: The yeast endocytic early/sorting compartment exists as an independent sub-compartment within the trans-Golgi network
Source: eLife. 2023 Jul 21;12:e84850. doi: 10.7554/eLife.84850 (PMC10361720; doi:10.7554/eLife.84850)
Supplement: Figure 5—figure supplement 1—source data 1. [file elife-84850-fig5-figsupp1-data1.xlsx]

## Sheet: Data list
	Figure No.	Data shown in the graph	Statistical method
	Figure 1B	% of Tlg2p or Sec7p or Tlg1p overlap with A594-a-factor	One-way ANOVA with Tukey's post-hoc test
	Figure 2H	% of Tlg2p or Vps21p merge with Abp1p	Unpaired t-test with Welch's correction
	Figure 3B	% of Tlg2p or Sec7p overlap with Vps21p	Unpaired t-test with Welch's correction
	Figure 3I	% of A647-a-factor co-localization with Tlg2p or Vps21p	One-way ANOVA with Tukey's post-hoc test
	Figure 3K	% of Tlg2p overlap with A594-a-factor in vps21D ypt52D cells	Unpaired t-test with Welch's correction
	Figure 4C	% of Sec7p localization with A594-a-factor	Unpaired t-test with Welch's correction
	Figure 4E	% of Tlg2p overlap with A594-a-factor
	Figure 5B	% of Tlg2p overlap with Sec7p	Unpaired t-test with Welch's correction
	Figure 2-figure supplement 1B	Number of Sec7p-positive puncta	Unpaired t-test with Welch's correction
	Figure 2-figure supplement 1D	% of Tlg2p overlap with Sec7p	Unpaired t-test with Welch's correction
	Figure 2-figure supplement 1E	Sec7p lifetime	Unpaired t-test with Welch's correction
	Figure 5-figure supplement 1H	% of Gga2p overlap with Tlg2p
	Figure 6-figure supplement 1B	% of Snc1p overlap with Tlg21p
	Figure 7-figure supplement 1F	% of Ypt31p overlap with A594-a-factor

## Sheet: Figure 5-figure supplement 1B
	Numerical data				Statistical analysis using Graphpad Prism 6.0
	Number of Sec7p-positive puncta				Unpaired t-test with Welch's correction result
	puncta #	M(Nocodazole)	S(Hydroxyurea)		Column B	M-phase
	1	16	13		vs.	vs.
	2	17	13		Column A	S-phase
	3	16	11
	4	15	9		P value	0.0103
	5	9	10		P value summary	*
	6	15	14		Significantly different? (P < 0.05)	Yes
	7	14	10		One- or two-tailed P value?	Two-tailed
	8	8	7		Welch-corrected t, df	t=2.916 df=15.71
	9	17	10
	10	15	10		Mean ± SEM of column A	10.7 ± 0.6675, n=10
					Mean ± SEM of column B	14.2 ± 0.9978, n=10
					Difference between means	3.5 ± 1.2
					95% confidence interval	0.9513 to 6.049
					R squared	0.3511
