# Supplementary material for: The yeast endocytic early/sorting compartment exists as an independent sub-compartment within the trans-Golgi network
Source: eLife. 2023 Jul 21;12:e84850. doi: 10.7554/eLife.84850 (PMC10361720; doi:10.7554/eLife.84850)
Supplement: Figure 5—figure supplement 1—source data 2. [file elife-84850-fig5-figsupp1-data2.xlsx]

## Sheet: Figure 5-figure supplement 1D
	Numerical data				Statistical analysis using Graphpad Prism 6.0
	% Tlg2p overlap with Sec7p				Unpaired t-test with Welch's correction result
		M(Nocodazole)	S(Hydroxyurea)		Column B	S(Hydroxyurea)
	1st assay	72.4138	73.6842		vs.	vs.
	2nd assay	80	77.7778		Column A	M(Nocodazole)
	3rd assay	69.697	70.5882
					P value	0.995
					P value summary	ns
					Significantly different? (P < 0.05)	No
					One- or two-tailed P value?	Two-tailed
					Welch-corrected t, df	t=1.414 df=14.69
					Mean ± SEM of column A	74.04 ± 5.33, n=3
					Mean ± SEM of column B	74.02 ± 3.61, n=3
