# Supplementary material for: The yeast endocytic early/sorting compartment exists as an independent sub-compartment within the trans-Golgi network
Source: eLife. 2023 Jul 21;12:e84850. doi: 10.7554/eLife.84850 (PMC10361720; doi:10.7554/eLife.84850)
Supplement: Figure 5—figure supplement 1—source data 3. [file elife-84850-fig5-figsupp1-data3.xlsx]

## Sheet: Figure 5-figure supplement 1E
	Numerical data				Statistical analysis using Graphpad Prism 6.0
	Sec7p lifetime				Unpaired t-test with Welch's correction result
	puncta #	WT	gga1D gga2D		Column B	gga1D gga2D
	1	65	125		vs.	vs.
	2	55	160		Column A	WT
	3	75	90
	4	125	165		P value	0.0052
	5	60	100		P value summary	**
	6	70	155		Significantly different? (P < 0.05)	Yes
	7	95	160		One- or two-tailed P value?	Two-tailed
	8	75	125		Welch-corrected t, df	t=3.066 df=25
	9	125	60
	10	75	90		Mean ± SEM of column A	83.57 ± 6.145, n=14
	11	95	100		Mean ± SEM of column B	119.6 ± 10.26, n=13
	12	90	70		Difference between means	36.04 ± 11.76
	13	60	155		95% confidence interval	11.83 to 60.26
	14	105			R squared	0.2732
