# Supplementary material for: The yeast endocytic early/sorting compartment exists as an independent sub-compartment within the trans-Golgi network
Source: eLife. 2023 Jul 21;12:e84850. doi: 10.7554/eLife.84850 (PMC10361720; doi:10.7554/eLife.84850)
Supplement: Figure 5—figure supplement 2—source data 1. [file elife-84850-fig5-figsupp2-data1.xlsx]

## Sheet: Figure 5-figure supplement 1H
	Numerical data
	% Tlg2p Overlap with Gga2p
	1st assay	64.7059
	2nd assay	64.7059
	3rd assay	64.2857
	Ave	64.5658
	SD	0.242584
