# Supplementary material for: The yeast endocytic early/sorting compartment exists as an independent sub-compartment within the trans-Golgi network
Source: eLife. 2023 Jul 21;12:e84850. doi: 10.7554/eLife.84850 (PMC10361720; doi:10.7554/eLife.84850)
Supplement: Figure 5—source data 1. [file elife-84850-fig5-data1.xlsx]

## Sheet: FIg5B(Statistic)
	Numerical data				Statistical analysis using Graphpad Prism 6.0
	% Tlg2p Overlap with Sec7p				Unpaired t-test with Welch's correction result
		WT	gga1D gga2D		Column B	gga1D gga2D
	1st assay	71.4286	40		vs.	vs.
	2nd assay	85.7143	44.4444		Column A	WT
	3rd assay	73.6842	48.1481
					P value	0.0029
					P value summary	**
					Significantly different? (P < 0.05)	Yes
					One- or two-tailed P value?	Two-tailed
					Welch-corrected t, df	t=6.522 df=4
					Mean ± SEM of column A	76.94 ± 4.434, n=3
					Mean ± SEM of column B	44.2 ± 2.355, n=3
					Difference between means	-32.74 ± 5.021
					95% confidence interval	-46.68 to -18.8
					R squared	0.914
