# Supplementary material for: The yeast endocytic early/sorting compartment exists as an independent sub-compartment within the trans-Golgi network
Source: eLife. 2023 Jul 21;12:e84850. doi: 10.7554/eLife.84850 (PMC10361720; doi:10.7554/eLife.84850)
Supplement: Figure 6—figure supplement 1—source data 1. [file elife-84850-fig6-figsupp1-data1.xlsx]

## Sheet: Data list
	Figure No.	Data shown in the graph	Statistical method
	Figure 1B	% of Tlg2p or Sec7p or Tlg1p overlap with A594-a-factor	One-way ANOVA with Tukey's post-hoc test
	Figure 2H	% of Tlg2p or Vps21p merge with Abp1p	Unpaired t-test with Welch's correction
	Figure 3B	% of Tlg2p or Sec7p overlap with Vps21p	Unpaired t-test with Welch's correction
	Figure 3I	% of A647-a-factor co-localization with Tlg2p or Vps21p	One-way ANOVA with Tukey's post-hoc test
	Figure 3K	% of Tlg2p overlap with A594-a-factor in vps21D ypt52D cells	Unpaired t-test with Welch's correction
	Figure 4C	% of Sec7p localization with A594-a-factor	Unpaired t-test with Welch's correction
	Figure 4E	% of Tlg2p overlap with A594-a-factor
	Figure 5B	% of Tlg2p overlap with Sec7p	Unpaired t-test with Welch's correction
	Figure 2-figure supplement 1B	Number of Sec7p-positive puncta	Unpaired t-test with Welch's correction
	Figure 2-figure supplement 1D	% of Tlg2p overlap with Sec7p	Unpaired t-test with Welch's correction
	Figure 2-figure supplement 1E	Sec7p lifetime	Unpaired t-test with Welch's correction
	Figure 5-figure supplement 1H	% of Gga2p overlap with Tlg2p
	Figure 6-figure supplement 1B	% of Snc1p overlap with Tlg21p
	Figure 7-figure supplement 1F	% of Ypt31p overlap with A594-a-factor

## Sheet: FIg5B(Statistic)
	Numerical data				Statistical analysis using Graphpad Prism 6.0
	% Tlg2p Overlap with Sec7p				Unpaired t-test with Welch's correction result
		WT	gga1D gga2D		Column B	gga1D gga2D
	1st assay	71.4286	40		vs.	vs.
	2nd assay	85.7143	44.4444		Column A	WT
	3rd assay	73.6842	48.1481
					P value	0.0029
					P value summary	**
					Significantly different? (P < 0.05)	Yes
					One- or two-tailed P value?	Two-tailed
					Welch-corrected t, df	t=6.522 df=4
					Mean ± SEM of column A	76.94 ± 4.434, n=3
					Mean ± SEM of column B	44.2 ± 2.355, n=3
					Difference between means	-32.74 ± 5.021
					95% confidence interval	-46.68 to -18.8
					R squared	0.914

## Sheet: Figure 6-figure supplement 1B 
	Numerical data				Statistical analysis using Graphpad Prism 6.0
	% Snc1p overlap with Tlg2p				Unpaired t-test with Welch's correction result
		WT	gga1Dgga2D		Column B	gga1Dgga2D
	1st assay	75	89.4737		vs.	vs.
	2nd assay	84.6154	77.7778		Column A	WT
	3rd assay	60	66.6667
					P value	0.6498
					P value summary	ns
					Significantly different? (P < 0.05)	No
					One- or two-tailed P value?	Two-tailed
					Welch-corrected t, df	t=0.49 df=4
					Mean ± SEM of column A	73.21 ± 7.162, n=3
					Mean ± SEM of column B	77.97 ± 6.585, n=3
					Difference between means	4.768 ± 9.729
					95% confidence interval	-22.24 to 31.78
					R squared	0.05663
