# Supplementary material for: The yeast endocytic early/sorting compartment exists as an independent sub-compartment within the trans-Golgi network
Source: eLife. 2023 Jul 21;12:e84850. doi: 10.7554/eLife.84850 (PMC10361720; doi:10.7554/eLife.84850)
Supplement: Figure 7—figure supplement 1—source data 1. [file elife-84850-fig7-figsupp1-data1.xlsx]

## Sheet: Figure 7-figure supplement1F
	Numerical data
		% Ypt31p Overlap with a-factor
		5 min	10 min	20 min
	1st assay	31.5789	16	7.40741
	2nd assay	27.7778	28.5714	8.33333
	3rd assay	27.7778	17.3913	13.6364
